# Supplementary material for: Improved Large-Scale Homology Search by Two-Step Seed Search Using Multiple Reduced Amino Acid Alphabets
Source: MDPI journal article supplement (doi:10.3390/genes12091455), 2021-09-21
Supplement: s1 [file s1]

# Supplementary Materials

## Improved Large-scale Homology Search by Two-Step Seed Search using Multiple Reduced Amino Acid Alphabets

Kazuki Takabatake, Kazuki Izawa, Motohiro Akikawa, Keisuke Yanagisawa, Masahito Ohue, and Yutaka Akiyama\*

Department of Computer Science, School of Computing, Tokyo Institute of Technology; takabatake@bi.c.titech.ac.jp (K.T.); izawa@bi.c.titech.ac.jp (K.I.); akikawa@bi.c.titech.ac.jp (M.A.); yanagisawa@c.titech.ac.jp (K.Y.); ohue@c.titech.ac.jp (M.O.)

\*Correspondence: akiyama@c.titech.ac.jp

### Supplementary Figures

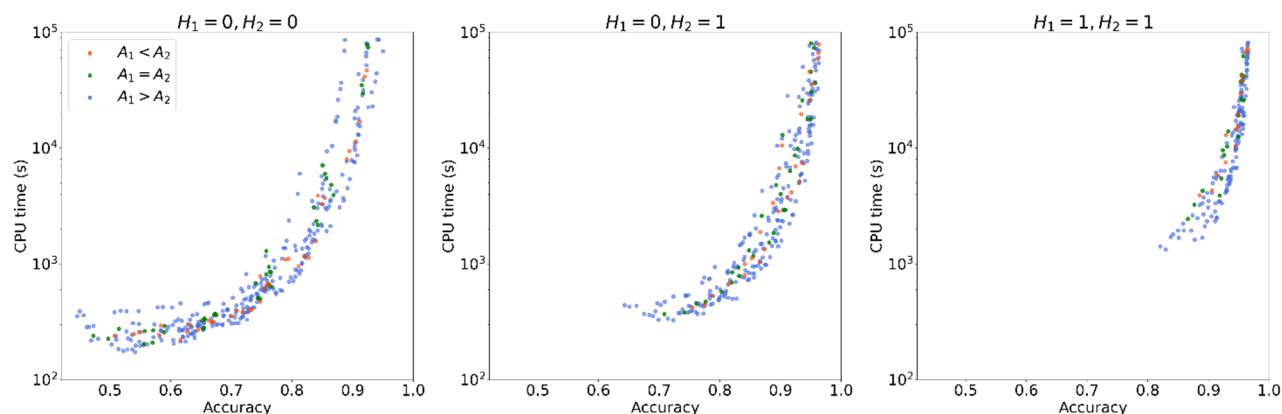

**Figure S1.** Results of TSSS for magnitude relationship between  $A_1$  and  $A_2$ .

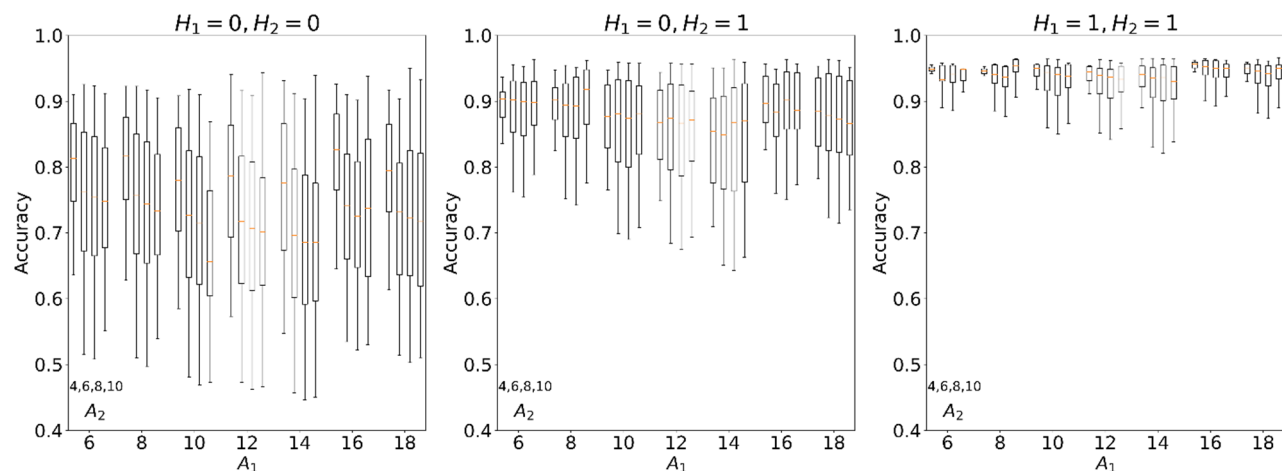

**Figure S2.** Boxplots based on accuracy for all combinations of  $A_1$  and  $A_2$ .

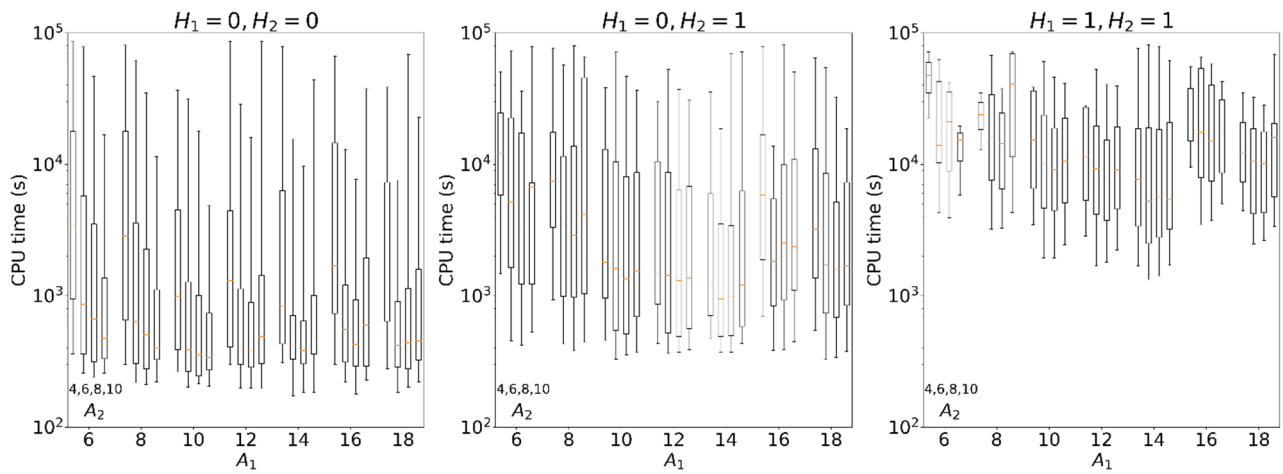

**Figure S3.** Boxplots based on CPU time for all combinations of  $A_1$  and  $A_2$ .
